# Supplementary material for: Ag/g-C3N4catalyst with superior catalytic performance for the degradation of dyes: a borohydride-generated superoxide radical approach
Source: Royal Society of Chemistry journal article supplement (doi:10.1039/c5nr03260a), 2015-01-01
Supplement: c5nr03260a1.pdf [file c5nr03260a1.pdf]

## Supplementary Information

### **Ag/g-C<sub>3</sub>N<sub>4</sub> catalyst with superior catalytic performance for the degradation of dyes: a borohydride-generated superoxide radicals approach**

Yongsheng Fu, Tinghuang, Lili Zhang and Xin Wang

**Table 1S.** MO photodegradation performances in the presence of Ag/g-C<sub>3</sub>N<sub>4</sub> or Ag/g-C<sub>3</sub>N<sub>4</sub>/TiO<sub>2</sub> nanocomposites.

| Samples                               | catalyst amount (mg) | MO volume (mL) | initial MO concentration (mg L <sup>-1</sup> ) | particle size of the Ag (nm) | MO degradation rate after 120 min (%) | reference |
|---------------------------------------|----------------------|----------------|------------------------------------------------|------------------------------|---------------------------------------|-----------|
| Ag/g-C <sub>3</sub> N <sub>4</sub>    | 150                  | 50             | 10                                             | 10-20                        | 79                                    | 1S        |
| Ag/g-C <sub>3</sub> N <sub>4</sub>    | 100                  | 100            | 10                                             | 10                           | 98                                    | 2S        |
| Ag/g-C <sub>3</sub> N <sub>4</sub> -4 | 10                   | 50             | 10                                             | 5.6                          | 86                                    | This work |

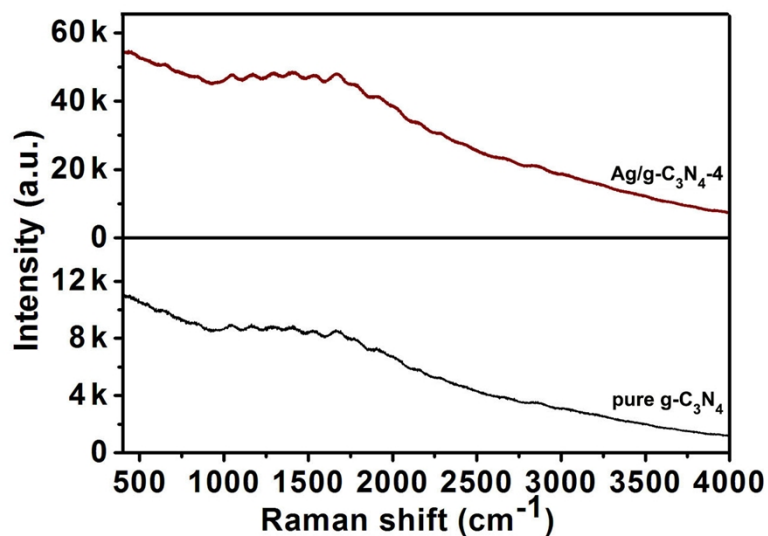

**Figure 1S.** Raman spectra of pure g-C<sub>3</sub>N<sub>4</sub> and ACN-4 samples.

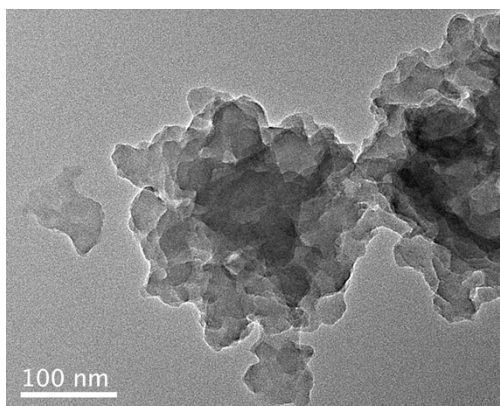

**Figure 2S.** TEM image of pure g-C<sub>3</sub>N<sub>4</sub> catalyst.

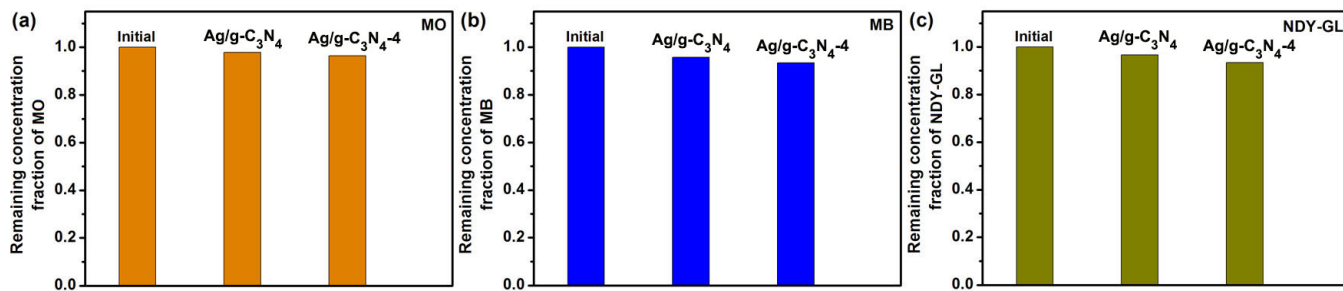

**Figure 3S.** Bar plot showing the remaining MO, MB and NDY-GL in solution after reaching the adsorption-desorption equilibrium in the dark for 60 min with stirring.

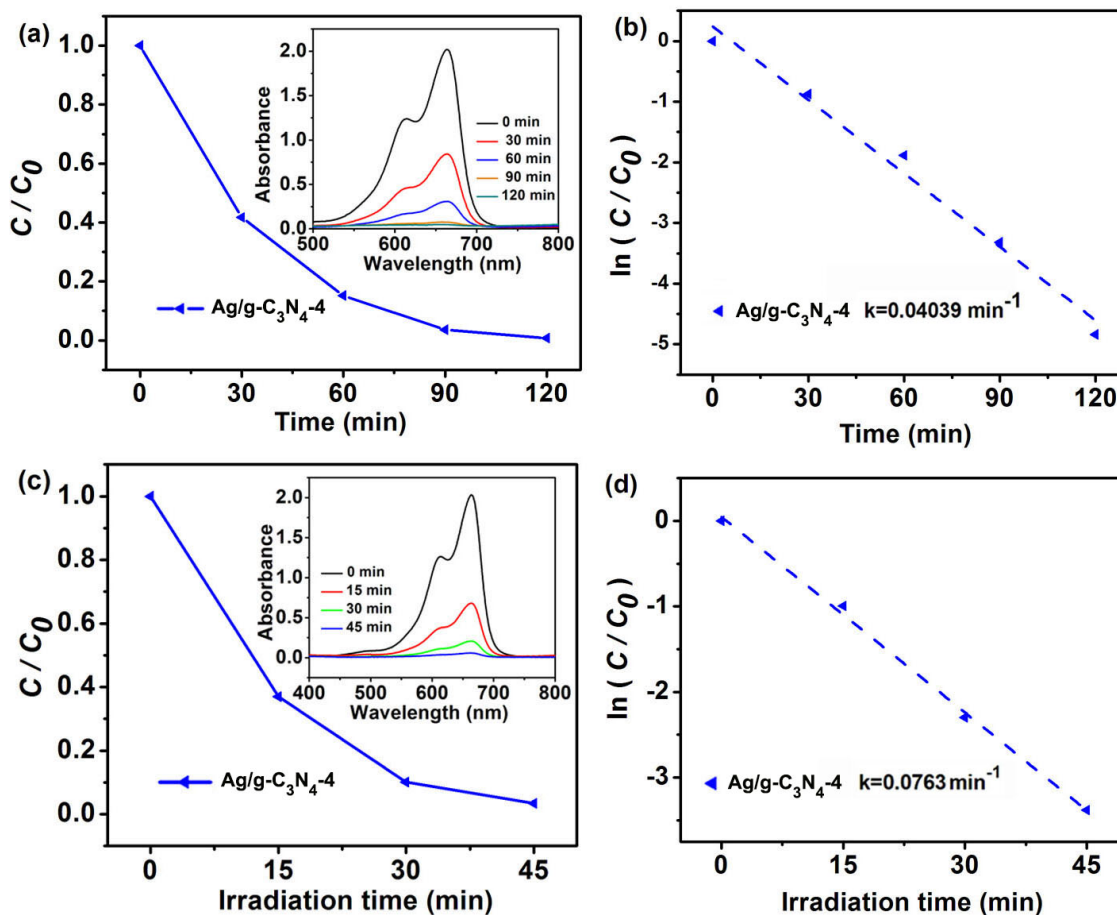

Figure 4S. Catalytic degradation of MB over Ag/g-C<sub>3</sub>N<sub>4</sub>-4 catalyst in the presence of BH<sub>4</sub><sup>-</sup> in the dark (a) and under visible light irradiation (c); Plot of  $\ln(c/c_0)$  against reaction time for Catalytic degradation of MB over Ag/g-C<sub>3</sub>N<sub>4</sub>-4 catalyst in the presence of BH<sub>4</sub><sup>-</sup> in the dark (b) and under visible light irradiation (d). The insets are time-dependent UV-vis absorption spectra for the catalytic degradation of MB over the Ag/g-C<sub>3</sub>N<sub>4</sub>-4 catalyst in the presence of BH<sub>4</sub><sup>-</sup> in the dark (a) and under visible light irradiation (c).

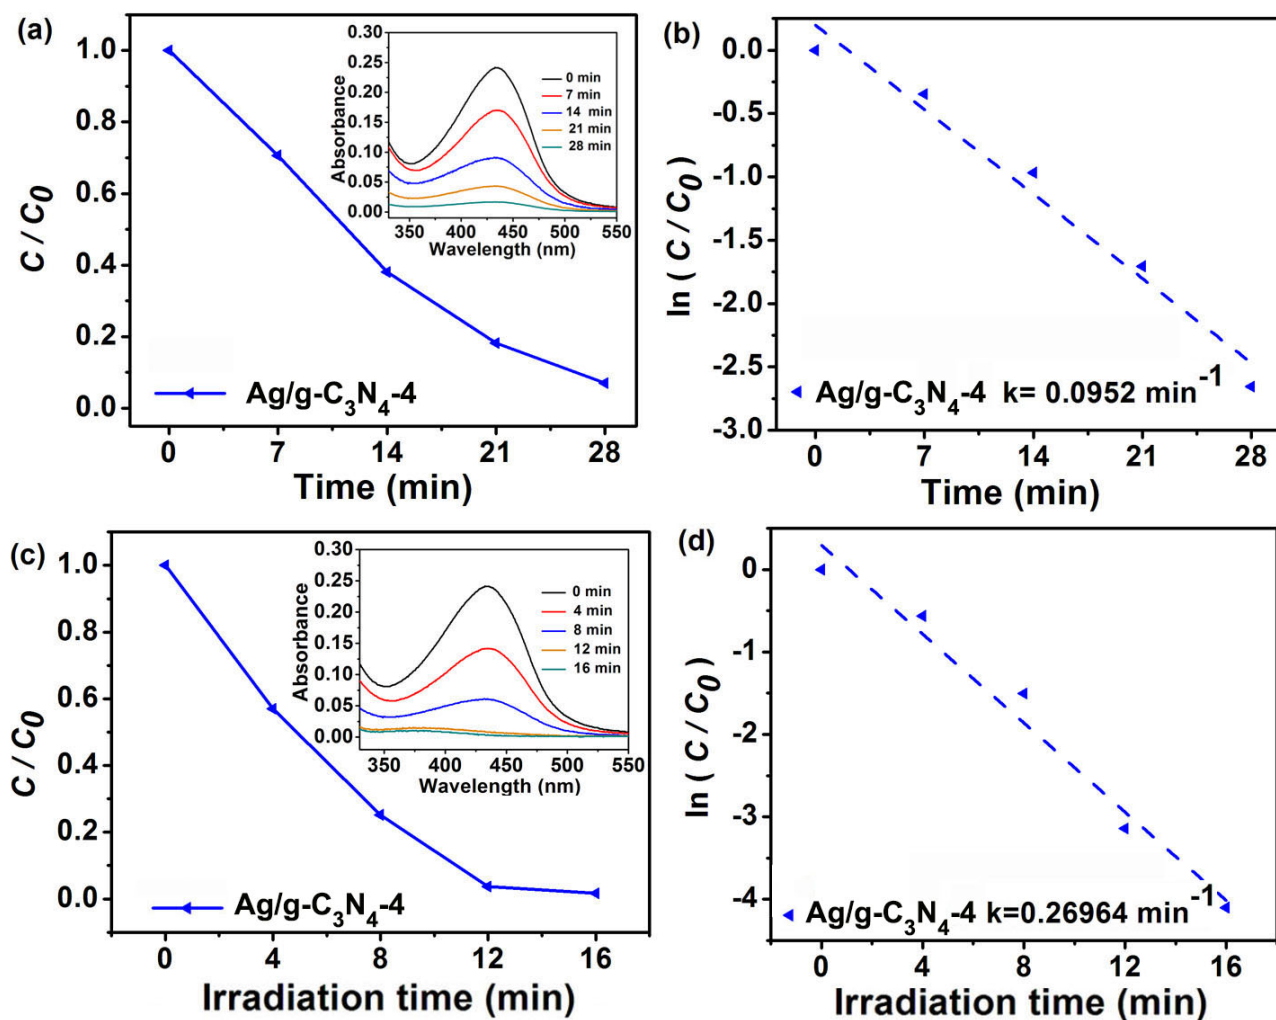

Figure 5S. Catalytic degradation of NDY-GL over Ag/g-C<sub>3</sub>N<sub>4</sub>-4 catalyst in the presence of BH<sub>4</sub><sup>-</sup> in the dark (a) and under visible light irradiation (c); Plot of  $\ln(c/c_0)$  against reaction time for Catalytic degradation of NDY-GL over Ag/g-C<sub>3</sub>N<sub>4</sub>-4 catalyst in the presence of BH<sub>4</sub><sup>-</sup> in the dark (b) and under visible light irradiation (d). The insets are time-dependent UV-vis absorption spectra for the catalytic degradation of NDY-GL over the Ag/g-C<sub>3</sub>N<sub>4</sub>-4 catalyst in the presence of BH<sub>4</sub><sup>-</sup> in the dark (a) and under visible light irradiation (c).

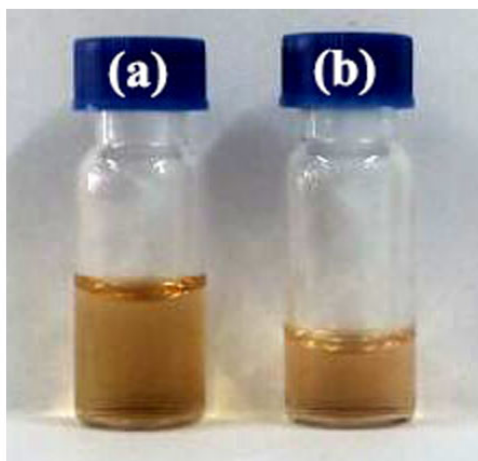

Figure 6S. (a)  $[\text{FeNO}]^{2+}$  standard solution and (b) The last step reaction solution of color reaction.

A typical experiment for the color reaction between the ferrous irons ( $\text{Fe}^{2+}$ ) and nitric oxide (NO) is as follows: 2 mg of the as-obtained Ag/g- $\text{C}_3\text{N}_4$ -4 catalyst was added into 5.0 mL of 0.1 g  $\text{mL}^{-1}$   $\text{NaBH}_4$  aqueous solution with 0.5 M NaOH and stirred for 10 min. Then 0.5 mL of phosphate buffer solution (PBS, pH = 7.8) and 2.0 mL of hydroxylamine hydrochloride aqueous solution (10 M) were added to 3.0 mL of above supernatant with stirring for 10 min at the room temperature. After that, 1 mL of above reaction solution was added to the 2 mL of  $\text{Ag}_2\text{SO}_4$  aqueous solution (0.02 M), then the resulting mixture was stirred for 2 min and centrifuged to remove the precipitation. Finally, a small amount of  $\text{FeSO}_4$  was added into the above supernatant and allowed to dissolve, then 0.5 mL HAc (2 M) was introduced.

The mechanisms of color reaction between the ferrous irons ( $\text{Fe}^{2+}$ ) and nitric oxide (NO) are as the following steps:

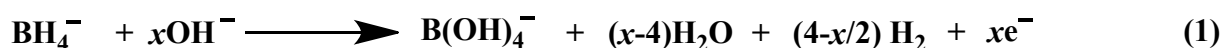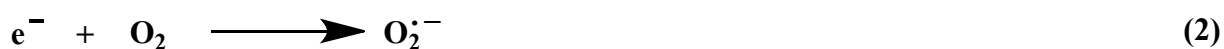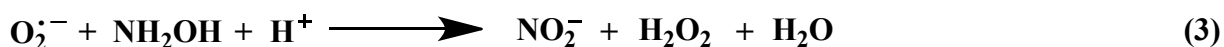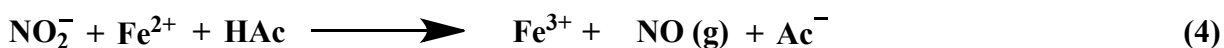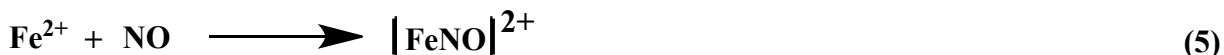

In aqueous alkaline medium,  $\text{BH}_4^-$  can be oxidized directly on the surface of Ag/g- $\text{C}_3\text{N}_4$ -4 catalyst with electrons being released (Eq. (2)), then electrons can quickly activate the adsorbed oxygen to produce  $\text{O}_2^{\cdot-}$  radicals (Eq. (2)). As a strong oxidant,  $\text{O}_2^{\cdot-}$  radicals could oxidize hydroxylamine ( $\text{NH}_2\text{OH}$ ) to  $\text{NO}_2^-$  (Eq.

(3)), which can be reduced to generate NO (Eq. (4)). Finally, the  $\text{Fe}^{2+}$  and NO react readily to produce  $[\text{FeNO}]^{2+}$  complex (Eq. (5)). It can be clearly seen that the color of reaction solution (Eq. (5)) appears brown (Fig 6S(b)), which is almost the same as that of  $[\text{FeNO}]^{2+}$  standard solution (Fig 6S(a)). Therefore, we can conclude that Ag/g- $\text{C}_3\text{N}_4$  catalyst can catalyze oxidation of  $\text{BH}_4^-$  to release electrons which can activate the adsorbed oxygen to  $\text{O}_2^{\bullet-}$  radicals.

## References

- 1S. L. Ge, C. Han, J. Liu and Y. Li, *Appl. Catal. A: Gen.*, 2011, **409-410**, 215-222.
- 2S. Y. Yang, Y. Guo, F. Liu, X. Yuan, Y. Guo, S. Zhang, W. Guo and M. Huo, *Appl. Catal. B: Environ.*, 2013, **142-143**, 828-837.
